# Supplementary material for: Generation of c-Fos knockout rats, and observation of their phenotype
Source: PubMed Central journal article supplement — Exp Anim. 2022 Oct 11;72(1):95–102. doi: 10.1538/expanim.22-0077 (PMC9978135; doi:10.1538/expanim.22-0077), 2022-10-11
Supplement: expanim-72-095-s001.pdf [file expanim-72-095-s001.pdf]

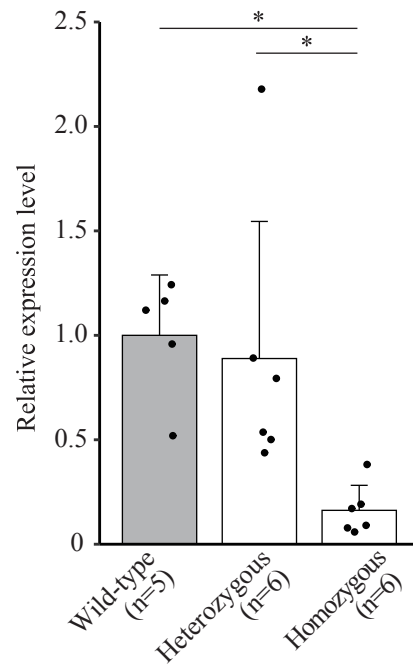

Supplementary Figure 1. *c-Fos* mRNA expression in the *c-Fos* KO rat. qPCR was performed using the PrimeTime qPCR Probe Assay (Integrated Data Technologies, Inc., USA). Rn.PT.39a.22214838.g and Rn.PT.58.24954639 were used for beta-actin and *c-Fos*. Bone marrow cells were collected from the femur of *c-Fos* KO rats and stored at  $-80^{\circ}\text{C}$  until use. Total RNA was purified from bone marrow cells using a FastGene RNA Premium Kit (FG-81050; Nippon Genetics Co., Ltd., Japan) and reverse-transcribed to cDNA using Rever-Tra Ace® qPCR RT Master Mix with gDNA Remover (FSQ-301; Toyobo Co., Ltd., Japan). We performed qPCR in accordance with the manufacturer's instructions. The error bar indicates the standard deviation, and significant differences were tested using Steel-Dwass test ( $*p < 0.05$ ) (WT rats [n = 5], heterozygous *c-Fos* KO rats [n = 6], and homozygous *c-Fos* KO rats [n = 6]).

| Wild-type                       | Heterozygous                   | Homozygous                      |
|---------------------------------|--------------------------------|---------------------------------|
| 3.57 ± 1.70<br>(30.8% ± 8.4%)** | 5.50 ± 2.07<br>(49.6% ± 12.2%) | 2.14 ± 1.29<br>(19.6% ± 9.8%)** |

n = 14 crossbreedings, Number of pup ± s.d. (% ± s.d.)

Supplementary Table 1. Average number of pups at birth

We crossbred heterozygous *c-Fos* KO rats. The genotyping protocol is reported in the Materials and Methods section. The Wilcoxon rank-sum test was performed to determine whether the expected Mendelian ratio between homozygous *c-Fos* KO and WT rats was equal (\*\* $p < 0.01$ ).
